# Supplementary material for: Worldwide trends in suicide mortality from 1990 to 2015 with a focus on the global recession time frame
Source: Springer Nature journal article supplement (doi:10.1007/s00038-019-01219-y), 2019-03-07

## Online Supplement

### Worldwide trends in suicide mortality from 1990 to 2015 with a focus on the global recession time frame

#### List of contents:

**eTable 1.** Age-standardized (world population) mortality rates from suicide (per 100,000) in men, average annual deaths of the latest period and percent changes in selected countries worldwide by three-year period (2004-2015)

**eTable 2.** Age-standardized (world population) mortality rates from suicide (per 100,000) in women, average annual deaths of the latest period and percent changes in selected countries worldwide by three-year period (2004-2015)

**eTable 3.** Percentage of deaths coded to ill-defined conditions and external causes of undetermined intent in selected countries worldwide (maximum value over the period 2004-2015)

**eFigure 1.** Age-standardized mortality rates from suicide per 100,000 men (a) and women (b) for the three-year period 2013-2015 by country

**eFigure 2.** Sex ratio of suicide mortality rates for the three-year period 2013-2015 by country

**eFigure 3.** Age-standardized mortality rates (ASMRs, world population) from suicide per 100,000 men from 1990 to 2015 in selected European countries by age categories (years).

**eFigure 4.** Age-standardized mortality rates (ASMRs, world population) from suicide per 100,000 men from 1990 to 2015 in selected non-European countries by age categories (years).

**eFigure 5.** Age-standardized mortality rates (ASMRs, world population) from suicide per 100,000 women from 1990 to 2015 in selected European countries by age categories (years).

**eFigure 6.** Age-standardized mortality rates (ASMRs, world population) from suicide per 100,000 women from 1990 to 2015 in selected non-European countries by age categories (years).

**eFigure 7.** Unemployment rates (estimates from the International Labour Organization, ILO) from 1991 to 2015 in selected European countries by sex.

**eFigure 8.** Unemployment rates (estimates from the International Labour Organization, ILO) from 1991 to 2015 in selected non-European countries by sex.

**eTable 1.** Age-standardized (world population) mortality rates (ASMRs) from suicide (per 100,000) in men, average annual deaths of the latest period and percentage changes, in selected countries worldwide by three-year period (2004-2015)

|                       | ASMRs        |                 |               |                 | Average annual deaths | Percentage changes |                    |                    |
|-----------------------|--------------|-----------------|---------------|-----------------|-----------------------|--------------------|--------------------|--------------------|
|                       | (Pre-crisis) | (Around crisis) | (Post-crisis) | (Latest period) | (Latest period)       | 2013-15 vs 2004-06 | 2007-09 vs 2004-06 | 2010-12 vs 2007-09 |
|                       | 2004-06      | 2007-09         | 2010-12       | 2013-15         | 2013-15               |                    |                    |                    |
| <b>Europe</b>         |              |                 |               |                 |                       |                    |                    |                    |
| Austria               | 18.94        | 16.75           | 16.35         | 15.24           | 966                   | -19.5              | -11.6              | -2.4               |
| Belarus               | -            | 38.75           | 34.58         | 26.89           | 1518                  | .                  | .                  | -10.8              |
| Belgium               | 20.53        | 19.39           | 19.54         | 17.06           | 1259                  | -16.9              | -5.6               | 0.8                |
| Bulgaria              | 13.48        | 12.09           | 11.85         | 10.33           | 555                   | -23.4              | -10.3              | -2                 |
| Croatia               | 20.55        | 19.42           | 18.3          | 17.99           | 539                   | -12.5              | -5.5               | -5.8               |
| Czech Republic        | 18.5         | 16.85           | 18.81         | 17.19           | 1202                  | -7.1               | -8.9               | 11.6               |
| Denmark               | 12.74        | 11.66           | 11.74         | 11.2            | 436                   | -12.1              | -8.5               | 0.7                |
| Estonia               | 28.54        | 25.76           | 22.27         | 21.99           | 174                   | -23                | -9.7               | -13.6              |
| Finland               | 24.5         | 23.79           | 21.36         | 18.22           | 608                   | -25.6              | -2.9               | -10.2              |
| France                | 18.6         | 17.77           | 17.29         | 15.43           | 6671                  | -17                | -4.5               | -2.7               |
| Germany               | 12.95        | 11.75           | 12.03         | 11.84           | 7342                  | -8.6               | -9.3               | 2.4                |
| Greece                | 4.01         | 3.95            | 4.88          | 5.79            | 432                   | 44.4               | -1.5               | 23.5               |
| Hungary               | 30.75        | 28.88           | 28.08         | 21.75           | 1485                  | -29.3              | -6.1               | -2.8               |
| Ireland               | 16.18        | 15.77           | 16.94         | 15.31           | 395                   | -5.4               | -2.5               | 7.4                |
| Italy                 | 6.86         | 6.84            | 7.3           | 6.9             | 3053                  | 0.6                | -0.3               | 6.7                |
| Kazakhstan            | 44.06        | 39.82           | 32.66         | 29.03           | 2581                  | -34.1              | -9.6               | -18                |
| Latvia                | 33.61        | 31.03           | 30.01         | 25.82           | 313                   | -23.2              | -7.7               | -3.3               |
| Lithuania             | 54.03        | 49.24           | 44.7          | 45.28           | 794                   | -16.2              | -8.9               | -9.2               |
| TFYR Macedonia        | 9.26         | 9.01            | 7.37          | 10.12           | 136                   | 9.3                | -2.7               | -18.2              |
| Netherlands           | 10.09        | 9.5             | 10.77         | 11.52           | 1277                  | 14.2               | -5.9               | 13.4               |
| Norway                | 13.57        | 12.38           | 12.84         | 11.9            | 380                   | -12.3              | -8.8               | 3.7                |
| Poland                | 22.14        | 21.3            | 22.95         | 21.23           | 5056                  | -4.1               | -3.8               | 7.8                |
| Portugal              | -            | 8.14            | 8.6           | 9.99            | 813                   | -                  | -                  | 5.7                |
| Republic of Moldova   | 26.26        | 25.01           | 23.28         | 22.63           | 482                   | -13.8              | -4.8               | -6.9               |
| Romania               | 16.62        | 15.29           | 16.51         | 14.85           | 1934                  | -10.7              | -8                 | 8                  |
| Russian Federation    | 46.9         | 39.29           | 31.34         | 28.68           | 23,794                | -38.9              | -16.2              | -20.2              |
| Slovakia              | 17.6         | 15.49           | 15.14         | 14.19           | 502                   | -19.4              | -12                | -2.3               |
| Slovenia              | 29.15        | 23.72           | 23.55         | 22.46           | 339                   | -23                | -18.6              | -0.7               |
| Spain                 | 8.09         | 7.71            | 7.22          | 8.06            | 2760                  | -0.4               | -4.7               | -6.4               |
| Sweden                | 13.98        | 14.21           | 13.33         | 13.15           | 831                   | -5.9               | 1.7                | -6.2               |
| Switzerland           | 16.83        | 16.09           | 13.27         | 13.02           | 764                   | -22.6              | -4.4               | -17.5              |
| Ukraine               | 32.4         | 29.71           | 27.52         | 24.46           | 6282                  | -24.5              | -8.3               | -7.4               |
| UK                    | 8.54         | 8.63            | 8.81          | 9.43            | 3654                  | 10.4               | 1.1                | 2.1                |
| UK, England and Wales | 7.73         | 7.75            | 8.05          | 8.8             | 3060                  | 13.8               | 0.3                | 3.9                |
| UK, Northern Ireland  | 15.97        | 18.73           | 17.98         | 16.92           | 169                   | 6                  | 17.3               | -4                 |
| UK, Scotland          | 14.52        | 14.45           | 13.82         | 13.65           | 425                   | -6                 | -0.5               | -4.4               |
| <b>America</b>        |              |                 |               |                 |                       |                    |                    |                    |
| Argentina             | 11.69        | 10.94           | 10.93         | 10.72           | 2443                  | -8.3               | -6.4               | -0.1               |
| Brazil                | 6.82         | 7.08            | 7.1           | 7.47            | 8358                  | 9.5                | 3.8                | 0.3                |
| Chile                 | 16.58        | 17.71           | 16.32         | 14.14           | 1443                  | -14.7              | 6.8                | -7.9               |
| Colombia              | 7.87         | 7.7             | 6.98          | 6.95            | 1755                  | -11.7              | -2.2               | -9.4               |
| Costa Rica            | 12.07        | 9.61            | 10.4          | 9.33            | 248                   | -22.7              | -20.4              | 8.2                |
| Cuba                  | 15.13        | 14.13           | 15.33         | 14.31           | 1186                  | -5.4               | -6.6               | 8.5                |
| Guatemala             | 3.42         | 5.43            | 4.08          | 4.73            | 336                   | 38.3               | 58.8               | -24.9              |
| Mexico                | 6.42         | 6.58            | 6.88          | 7.39            | 4855                  | 15.1               | 2.5                | 4.6                |
| Panama                | 9.43         | 8.43            | 6.46          | 5.4             | 111                   | -42.7              | -10.6              | -23.4              |
| Puerto Rico           | 11.99        | 12.31           | 10.34         | 8.92            | 196                   | -25.6              | 2.7                | -16                |
| Trinidad and Tobago   | 16.88        | 16.86           | 15.74         | -               | 120                   | -                  | -0.1               | -6.6               |
| Uruguay               | 20.9         | 22.22           | 23.2          | 23.41           | 460                   | 12                 | 6.3                | 4.4                |
| Venezuela             | 6.33         | 4.92            | 4.27          | 3.26            | 500                   | -48.5              | -22.3              | -13.2              |
| Canada                | 14.08        | 13.77           | 13.63         | 13.58           | 3033                  | -3.6               | -2.2               | -1                 |
| USA                   | 14.78        | 15.5            | 16.48         | 17.04           | 32,993                | 15.3               | 4.9                | 6.3                |
| <b>Australasia</b>    |              |                 |               |                 |                       |                    |                    |                    |

|                   |       |       |       |       |        |       |       |       |
|-------------------|-------|-------|-------|-------|--------|-------|-------|-------|
| Mauritius         | 11.85 | 12.31 | 12.2  | 12.25 | 86     | 3.4   | 3.9   | -0.9  |
| Hong Kong SAR     | 16.43 | 12.84 | 11.8  | 12.58 | 603    | -23.4 | -21.9 | -8.1  |
| Israel            | 7.28  | 6.55  | 7.53  | 5.54  | 238    | -23.9 | -10   | 15    |
| Japan             | 25.44 | 25.52 | 23.49 | 20.4  | 17,002 | -19.8 | 0.3   | -8    |
| Kuwait            | 1.71  | 1.66  | 1.31  | 1.61  | 40     | -5.9  | -2.9  | -21.1 |
| Philippines       | 3.43  | 3.27  | 3.85  | -     | 1732   | -     | -4.7  | 17.7  |
| Republic of Korea | 27.74 | 28.64 | 31.41 | 27.74 | 9785   | 0     | 3.2   | 9.7   |
| Turkmenistan      | 15.3  | 7.64  | 4.01  | 3.01  | 86     | -80.3 | -50.1 | -47.5 |
| Australia         | 13.81 | 13.81 | 13.91 | 15.28 | 2127   | 10.6  | 0     | 0.7   |
| New Zealand       | 17.42 | 16.48 | 16.39 | 14.91 | 366    | -14.4 | -5.4  | -0.6  |

Note: Data for one or more calendar years were not available for Belarus in 2012 and 2015, Bulgaria in 2015, France in 2015, Ireland in 2015, TFYR Macedonia in 2014-2015, Portugal in 2005, the Russian Federation in 2014-2015, Slovakia in 2006-2007, 2011, and 2015, Ukraine in 2013, Costa Rica in 2015, Trinidad and Tobago in 2012-2015, Uruguay in 2011, Venezuela in 2014-2015, Canada in 2014-2015, Mauritius in 2009, Philippines in 2004-05 and 2012-2015, Australia in 2005 and New Zealand in 2014-2015. In these cases, the ASMR for the three-year period was computed by using the available years.

**eTable 2.** Age-standardized (world population) mortality rates (ASMRs) from suicide (per 100,000) in women, average annual deaths of the latest period and percentage changes, in selected countries worldwide by three-year period (2004-2015)

|                          | ASMRs            |                    |                   |                    | Average                             | Percentage changes    |                       |                       |
|--------------------------|------------------|--------------------|-------------------|--------------------|-------------------------------------|-----------------------|-----------------------|-----------------------|
|                          | (Pre-<br>crisis) | (Around<br>crisis) | (Post-<br>crisis) | (Latest<br>period) | annual deaths<br>(Latest<br>period) | 2013-15 vs<br>2004-06 | 2007-09 vs<br>2004-06 | 2010-12 vs<br>2007-09 |
|                          | 2004-06          | 2007-09            | 2010-12           | 2013-15            | 2013-15                             |                       |                       |                       |
| <b>Europe</b>            |                  |                    |                   |                    |                                     |                       |                       |                       |
| Austria                  | 5.06             | 4.57               | 4.4               | 4.48               | 307                                 | -11.5                 | -9.7                  | -3.7                  |
| Belarus                  | .                | 6.65               | 5.58              | 4.25               | 305                                 | .                     | .                     | -16.1                 |
| Belgium                  | 6.99             | 6.94               | 7.05              | 6.52               | 517                                 | -6.7                  | -0.7                  | 1.6                   |
| Bulgaria                 | 3.8              | 3.42               | 2.86              | 2.34               | 156                                 | -38.4                 | -10                   | -16.4                 |
| Croatia                  | 6                | 4.67               | 4.89              | 4.92               | 176                                 | -18                   | -22.2                 | 4.7                   |
| Czech Republic           | 3.55             | 3.06               | 3.39              | 3.66               | 276                                 | 3.1                   | -13.8                 | 10.8                  |
| Denmark                  | 4.72             | 4.16               | 3.96              | 3.96               | 165                                 | -16.1                 | -11.9                 | -4.8                  |
| Estonia                  | 4.94             | 4.31               | 3.57              | 3.8                | 44                                  | -23.1                 | -12.8                 | -17.2                 |
| Finland                  | 7.93             | 7.6                | 6.61              | 5.81               | 195                                 | -26.7                 | -4.2                  | -13                   |
| France                   | 6.24             | 5.64               | 5.28              | 4.61               | 2175                                | -26.1                 | -9.6                  | -6.4                  |
| Germany                  | 3.82             | 3.45               | 3.65              | 3.81               | 2546                                | -0.3                  | -9.7                  | 5.8                   |
| Greece                   | 0.97             | 0.78               | 0.98              | 1.42               | 110                                 | 46.4                  | -19.6                 | 25.6                  |
| Hungary                  | 7.44             | 6.71               | 6.56              | 5.58               | 477                                 | -25                   | -9.8                  | -2.2                  |
| Ireland                  | 3.48             | 4.43               | 3.84              | 3.46               | 92                                  | -0.6                  | 27.3                  | -13.3                 |
| Italy                    | 1.97             | 1.87               | 1.82              | 1.89               | 872                                 | -4.1                  | -5.1                  | -2.7                  |
| Kazakhstan               | 7.56             | 8.15               | 6.46              | 6.22               | 589                                 | -17.7                 | 7.8                   | -20.7                 |
| Latvia                   | 5.15             | 5.32               | 3.88              | 4.23               | 71                                  | -17.9                 | 3.3                   | -27.1                 |
| Lithuania                | 9.13             | 7.43               | 7.59              | 7.75               | 176                                 | -15.1                 | -18.6                 | 2.2                   |
| TFYR Macedonia           | 3.54             | 3.15               | 2.81              | 2.22               | 34                                  | -37.3                 | -11                   | -10.8                 |
| Netherlands              | 4.47             | 3.96               | 4.67              | 5.07               | 575                                 | 13.4                  | -11.4                 | 17.9                  |
| Norway                   | 5.77             | 5.38               | 5.31              | 5.42               | 168                                 | -6.1                  | -6.8                  | -1.3                  |
| Poland                   | 3.43             | 3.25               | 2.95              | 3.01               | 789                                 | -12.2                 | -5.3                  | -9.2                  |
| Portugal                 | -                | 2.12               | 2.02              | 2.69               | 249                                 | .                     | .                     | -4.7                  |
| Republic of Moldova      | 4.16             | 3.85               | 3.97              | 3.75               | 87                                  | -9.9                  | -7.5                  | 3.1                   |
| Romania                  | 2.92             | 2.8                | 2.68              | 2.27               | 342                                 | -22.3                 | -4.1                  | -4.3                  |
| Russian Federation       | 7.23             | 6.73               | 5.47              | 4.82               | 4985                                | -33.3                 | -6.9                  | -18.7                 |
| Slovakia                 | 2.81             | 1.84               | 2.19              | 2.19               | 82                                  | -22.1                 | -34.5                 | 19                    |
| Slovenia                 | 7.99             | 5.74               | 4.96              | 4.57               | 80                                  | -42.8                 | -28.2                 | -13.6                 |
| Spain                    | 2.32             | 2.17               | 1.99              | 2.66               | 915                                 | 14.7                  | -6.5                  | -8.3                  |
| Sweden                   | 6.26             | 5.74               | 5.28              | 5.83               | 354                                 | -6.9                  | -8.3                  | -8                    |
| Switzerland              | 7.09             | 6.5                | 4.77              | 4.67               | 275                                 | -34.1                 | -8.3                  | -26.6                 |
| Ukraine                  | 4.72             | 4.59               | 4.67              | 4.61               | 1491                                | -2.3                  | -2.8                  | 1.7                   |
| UK                       | 2.49             | 2.31               | 2.35              | 2.61               | 1055                                | 4.8                   | -7.2                  | 1.7                   |
| UK, England and<br>Wales | 2.23             | 2.03               | 2.07              | 2.39               | 871                                 | 7.2                   | -9                    | 2                     |
| UK, Northern Ireland     | 4.08             | 5.04               | 4.74              | 4.35               | 44                                  | 6.6                   | 23.5                  | -6                    |
| UK, Scotland             | 4.54             | 4.21               | 4.47              | 4.28               | 140                                 | -5.7                  | -7.3                  | 6.2                   |
| <b>America</b>           |                  |                    |                   |                    |                                     |                       |                       |                       |
| Argentina                | 2.77             | 2.65               | 2.57              | 2.66               | 608                                 | -4                    | -4.3                  | -3                    |
| Brazil                   | 1.67             | 1.71               | 1.84              | 1.89               | 2222                                | 13.2                  | 2.4                   | 7.6                   |
| Chile                    | 3.08             | 4.25               | 3.68              | 3.29               | 334                                 | 6.8                   | 38                    | -13.4                 |
| Colombia                 | 2.01             | 1.82               | 1.54              | 1.63               | 418                                 | -18.9                 | -9.5                  | -15.4                 |
| Costa Rica               | 2.06             | 1.65               | 1.83              | 1.6                | 42                                  | -22.3                 | -19.9                 | 10.9                  |
| Cuba                     | 4.72             | 4.03               | 3.98              | 3.62               | 301                                 | -23.3                 | -14.6                 | -1.2                  |
| Guatemala                | 0.95             | 1.42               | 1.17              | 1.52               | 135                                 | 60                    | 49.5                  | -17.6                 |
| Mexico                   | 1.22             | 1.41               | 1.55              | 1.73               | 1160                                | 41.8                  | 15.6                  | 9.9                   |
| Panama                   | 1.34             | 1.52               | 1.02              | 0.84               | 17                                  | -37.3                 | 13.4                  | -32.9                 |
| Puerto Rico              | 1.22             | 1.71               | 1.88              | 1.34               | 31                                  | 9.8                   | 40.2                  | 9.9                   |
| Trinidad and Tobago      | 3.47             | 3.41               | 3.95              | .                  | 29                                  | .                     | -1.7                  | 15.8                  |
| Uruguay                  | 5.66             | 5.47               | 5.73              | 5.71               | 122                                 | 0.9                   | -3.4                  | 4.8                   |
| Venezuela                | 1.36             | 1.09               | 0.87              | 0.74               | 116                                 | -45.6                 | -19.9                 | -20.2                 |
| Canada                   | 4.38             | 4.45               | 4.59              | 4.77               | 1013                                | 8.9                   | 1.6                   | 3.2                   |
| USA                      | 3.82             | 4.09               | 4.48              | 5.03               | 9632                                | 31.7                  | 7.1                   | 9.5                   |
| <b>Australasia</b>       |                  |                    |                   |                    |                                     |                       |                       |                       |
| Mauritius                | 3.69             | 3.11               | 3.43              | 3.43               | 22                                  | -7.1                  | -15.7                 | 10.3                  |
| Hong Kong SAR            | 8.67             | 6.85               | 5.96              | 6.38               | 368                                 | -26.4                 | -21                   | -13                   |

|                   |      |       |       |      |      |       |      |       |
|-------------------|------|-------|-------|------|------|-------|------|-------|
| Israel            | 2.1  | 1.47  | 1.64  | 1.43 | 66   | -31.9 | -30  | 11.6  |
| Japan             | 8.9  | 9.37  | 9.17  | 7.94 | 7409 | -10.8 | 5.3  | -2.1  |
| Kuwait            | 1.06 | 1.17  | 0.93  | 0.82 | 17   | -22.6 | 10.4 | -20.5 |
| Philippines       | 0.94 | 0.99  | 1.09  | .    | 524  | .     | 5.3  | 10.1  |
| Republic of Korea | 11.6 | 14.93 | 14.28 | 11.4 | 4140 | -1.7  | 28.7 | -4.4  |
| Turkmenistan      | 3.86 | 2.2   | 1.4   | 1.19 | 36   | -69.2 | -43  | -36.4 |
| Australia         | 3.86 | 4.1   | 4.5   | 5.06 | 693  | 31.1  | 6.2  | 9.8   |
| New Zealand       | 5.47 | 5.19  | 5.71  | 6.07 | 147  | 11    | -5.1 | 10    |

Note: Data for one or more calendar years were not available for Belarus in 2012 and 2015, Bulgaria in 2015, France in 2015, Ireland in 2015, TFYR Macedonia in 2014-2015, Portugal in 2005, the Russian Federation in 2014-2015, Slovakia in 2006-2007, 2011, and 2015, Ukraine in 2013, Costa Rica in 2015, Trinidad and Tobago in 2012-2015, Uruguay in 2011, Venezuela in 2014-2015, Canada in 2014-2015, Mauritius in 2009, Philippines in 2004-05 and 2012-2015, Australia in 2005 and New Zealand in 2014-2015. In these cases, the ASMR for the three-year period was computed by using the available years.

**eTable 3.** Percentage of deaths coded to ill-defined conditions and external causes of undetermined intent in selected countries worldwide (maximum value over the period 2004-2015)

|                       | Ill-defined causes <sup>a</sup> (%) | Undetermined intent <sup>b</sup> (%) |
|-----------------------|-------------------------------------|--------------------------------------|
| <b>Europe</b>         |                                     |                                      |
| Austria               | 10.01                               | 0.39                                 |
| Belarus               | 15.13                               | 0                                    |
| Belgium               | 15.08                               | 0.39                                 |
| Bulgaria              | 27.26                               | 0.18                                 |
| Croatia               | 12.55                               | 0.03                                 |
| Czech Republic        | 14.64                               | 0.49                                 |
| Denmark               | 13.48                               | 0.35                                 |
| Estonia               | 6.99                                | 1.02                                 |
| Finland               | 2.86                                | 0.23                                 |
| France                | 16.52                               | 0.12                                 |
| Germany               | 12.59                               | 0.31                                 |
| Greece                | 24.3                                | 0.06                                 |
| Hungary               | 5.63                                | 0.21                                 |
| Ireland               | 4.89                                | 0.67                                 |
| Italy                 | 9.16                                | 0.02                                 |
| Kazakhstan            | 22.24                               | 1.67                                 |
| Latvia                | 11.3                                | 0.75                                 |
| Lithuania             | 5.55                                | 1.09                                 |
| TFYR Macedonia        | 15.53                               | 0.05                                 |
| Netherlands           | 14.13                               | 0.08                                 |
| Norway                | 13.37                               | 0.02                                 |
| Poland                | 31.34                               | 0.76                                 |
| Portugal              | 18.82                               | 1.11                                 |
| Republic of Moldova   | 2.18                                | 0.89                                 |
| Romania               | 8.25                                | 0.12                                 |
| Russian Federation    | 6.67                                | 0                                    |
| Slovakia              | 9.83                                | 5.74                                 |
| Slovenia              | 11.75                               | 0.74                                 |
| Spain                 | 11.09                               | 0.03                                 |
| Sweden                | 12.43                               | 0.43                                 |
| Switzerland           | 12.49                               | 0.14                                 |
| Ukraine               | 7.05                                | 0                                    |
| UK                    | 7.14                                | 0.42                                 |
| UK, England and Wales | 7.46                                | 0.43                                 |
| UK, Northern Ireland  | 5.31                                | 0.73                                 |
| UK, Scotland          | 4.77                                | 0.67                                 |
| <b>America</b>        |                                     |                                      |
| Argentina             | 22.43                               | 0.98                                 |
| Brazil                | 17.53                               | 1.28                                 |
| Chile                 | 6.37                                | 0                                    |
| Colombia              | 6.61                                | 1.19                                 |
| Costa Rica            | 6.68                                | 0.6                                  |
| Cuba                  | 7.1                                 | 0.33                                 |
| Guatemala             | 27.06                               | 7.18                                 |
| Mexico                | 5.11                                | 0.88                                 |
| Panama                | 12.05                               | 0.98                                 |
| Puerto Rico           | 8.25                                | 0.12                                 |
| Trinidad and Tobago   | 5.38                                | 1.23                                 |
| Uruguay               | 18.45                               | 0.06                                 |
| Venezuela             | 9.11                                | 6.4                                  |
| Canada                | 6.55                                | 0.31                                 |
| USA                   | 7.22                                | 0.22                                 |
| <b>Australasia</b>    |                                     |                                      |
| Mauritius             | 9.69                                | 0.17                                 |
| Hong Kong SAR         | 7.33                                | 0.36                                 |
| Israel                | 10.76                               | 0.47                                 |
| Japan                 | 15.69                               | 0.23                                 |
| Kuwait                | 16.42                               | 1.53                                 |
| Philippines           | 10.45                               | 1.02                                 |
| Republic of Korea     | 15.8                                | 1.24                                 |
| Turkmenistan          | 15.24                               | 0                                    |
| Australia             | 6.07                                | 0.34                                 |
| New Zealand           | 3.38                                | 0.12                                 |

<sup>a</sup> Percentage of deaths coded to symptoms, signs and ill-defined conditions (ICD-10 codes: R00-R99), injury deaths with undetermined intent (ICD-10 codes: Y10-Y34 and Y872), secondary neoplasms and neoplasms of unspecified sites (ICD-10 codes: C76, C80, C97) and ill-defined cardiovascular causes (ICD-10 codes: I47.2, I49.0, I46, I50, I51.4, I51.5, I51.6, I51.9, I70.9).

<sup>b</sup> Percentage of deaths coded to injury deaths with undetermined intent (ICD-10 codes: Y10-Y34 and Y872).

**Figure 1.** Age-standardized mortality rates from suicide per 100,000 men (a) and women (b) for the three-year period 2013-2015 by country.

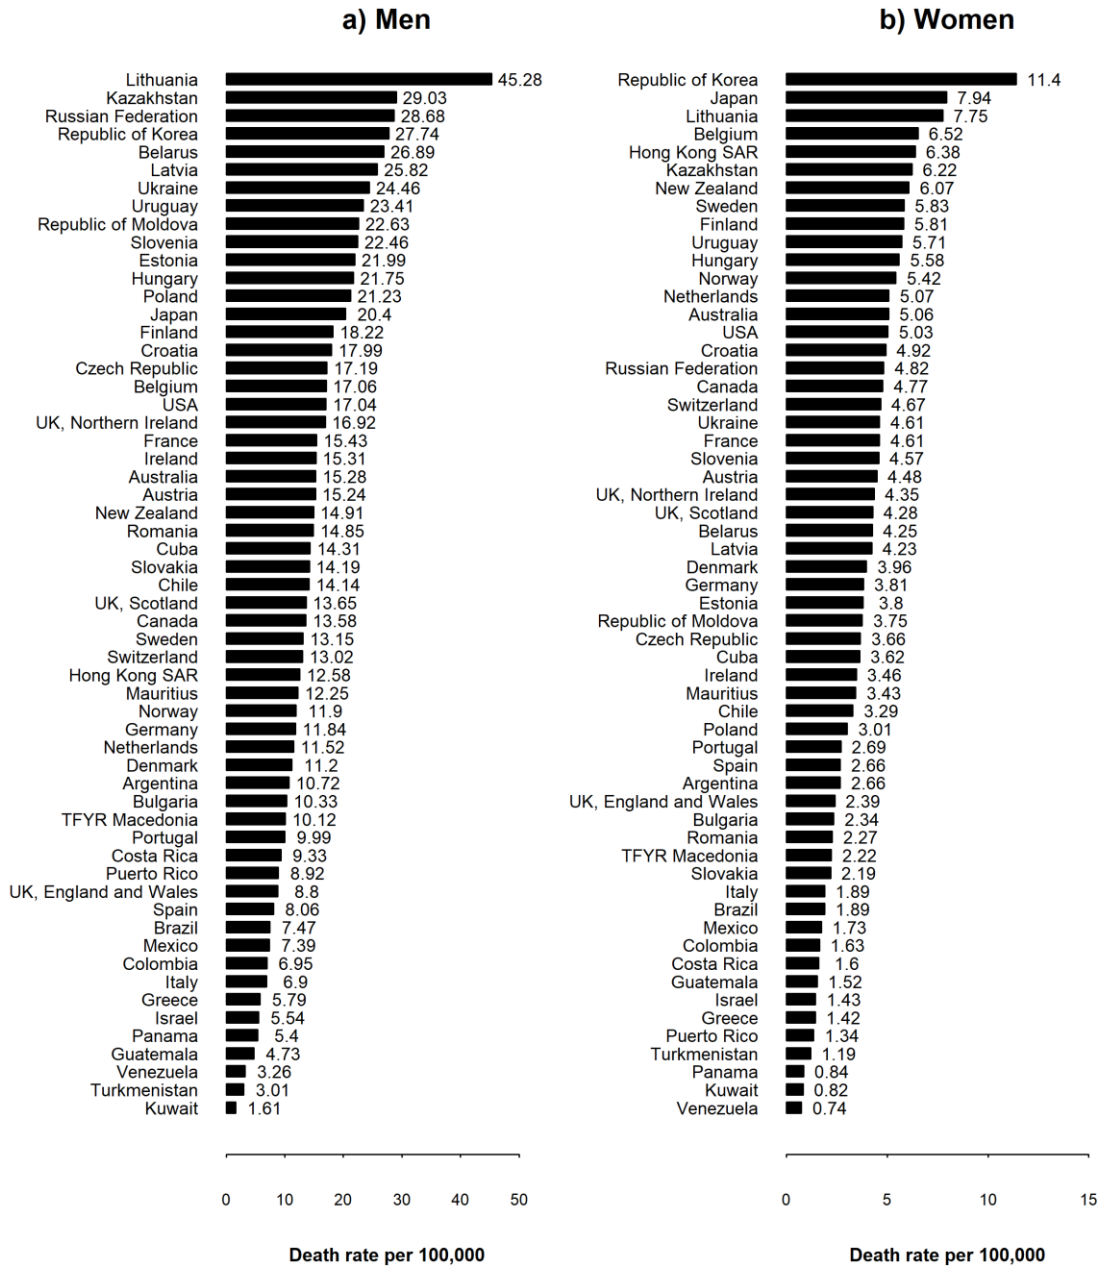

**eFigure 2.** Sex ratio of suicide mortality rates for the three-year period 2013-2015 by country.

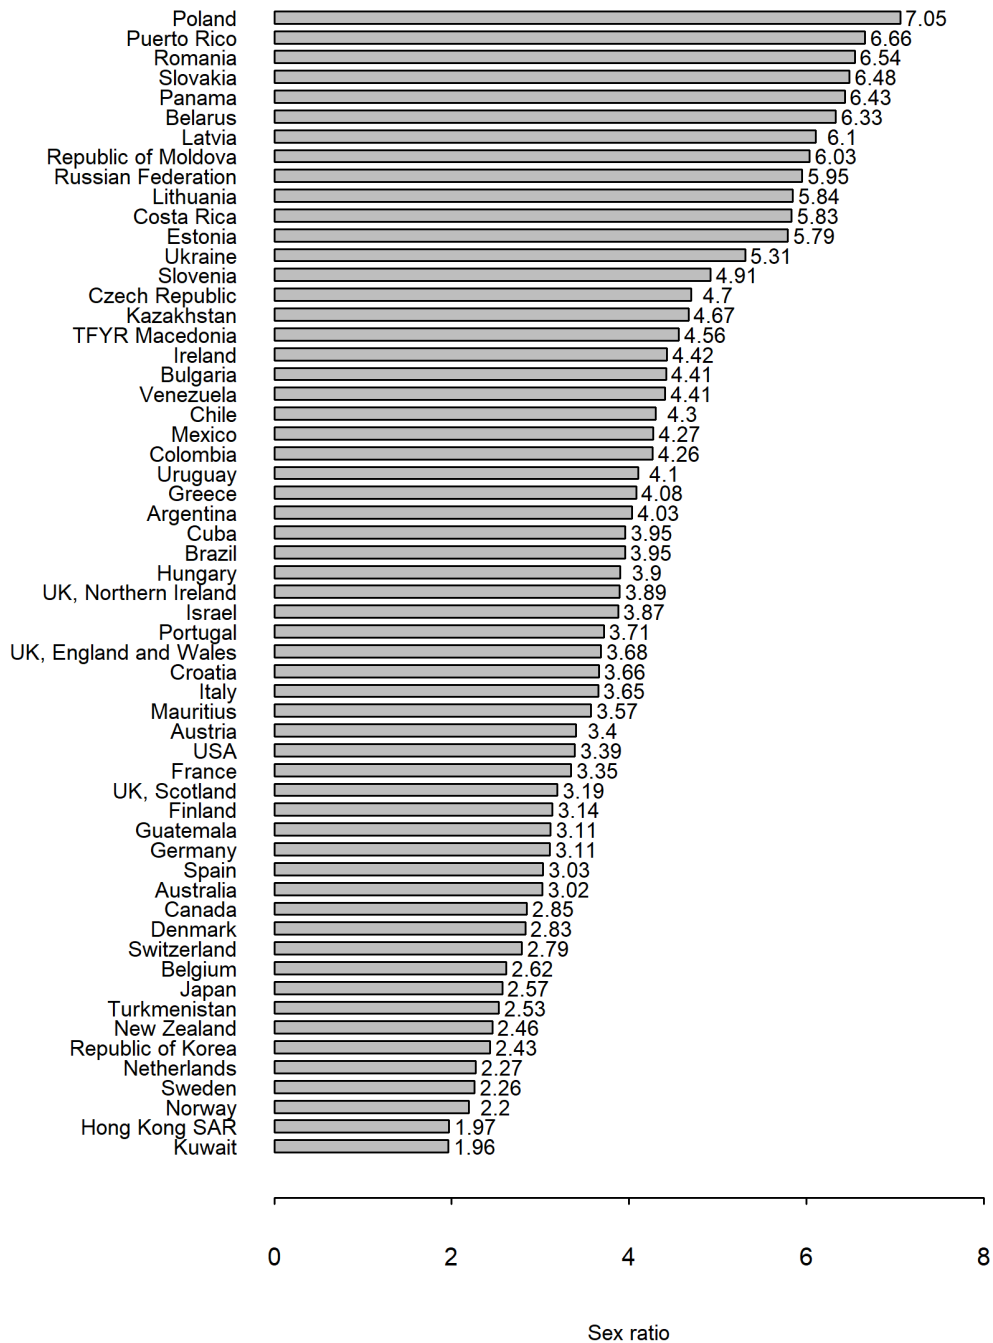



**Figure 3.** Age-standardized mortality rates (ASMRs) from suicide per 100,000 men from 1990 to 2015 in selected European countries by age categories (years)

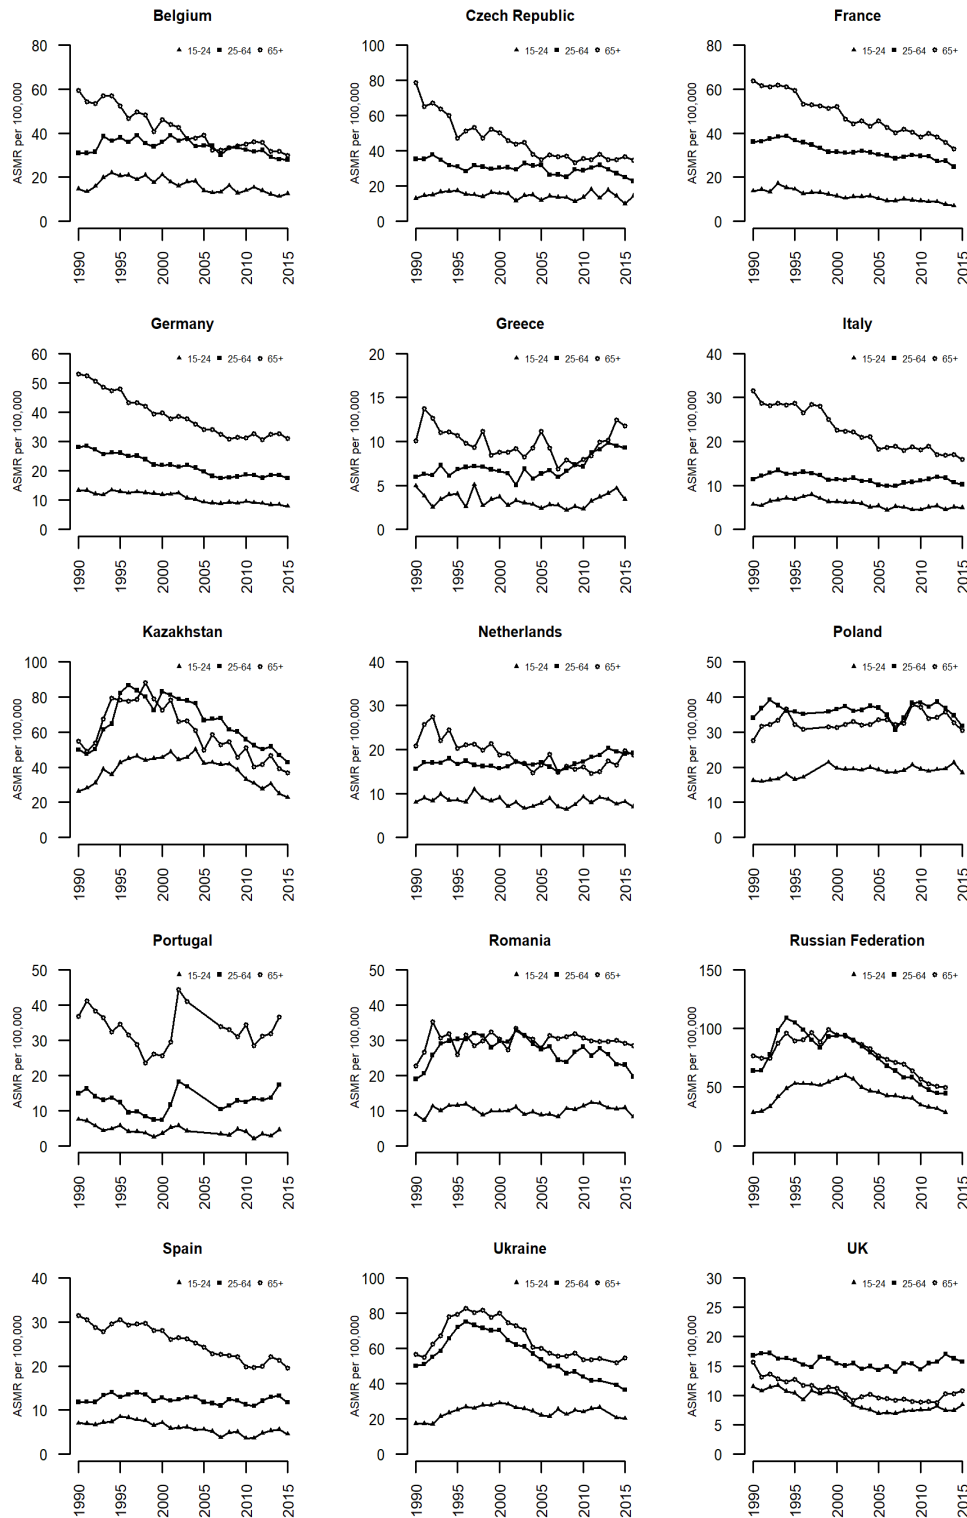

**Figure 4.** Age-standardized mortality rates (ASMRs) from suicide per 100,000 men from 1990 to 2015 in selected non-European countries by age categories (years)

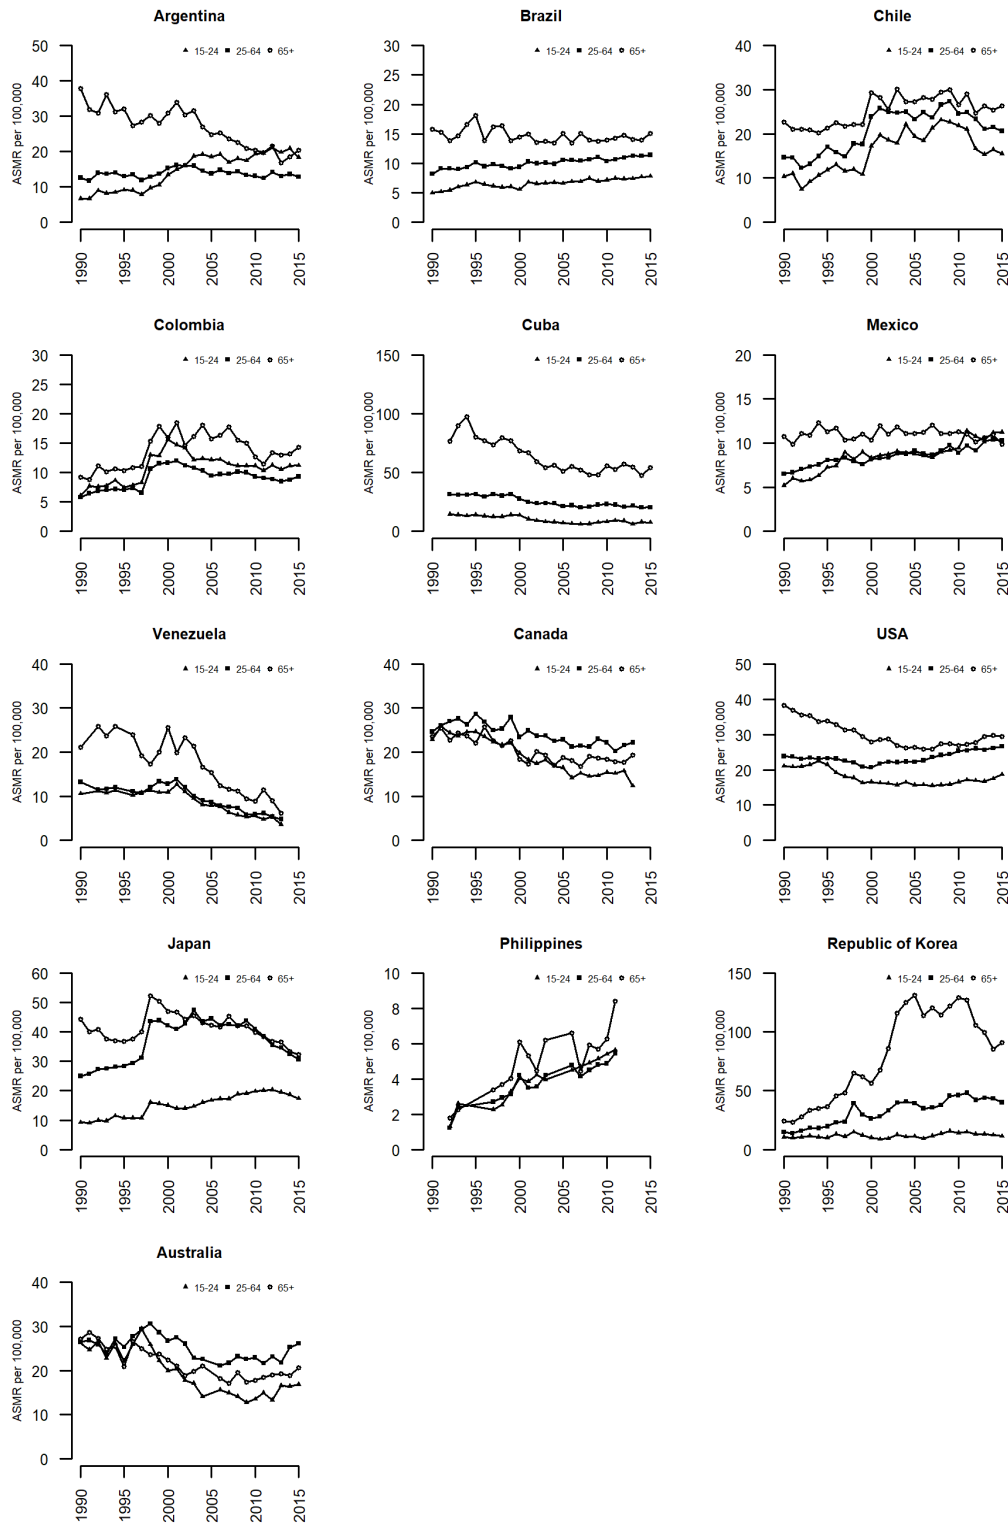

**Figure 5.** Age-standardized mortality rates (ASMRs) from suicide per 100,000 women from 1990 to 2015 in selected European countries by age categories (years)

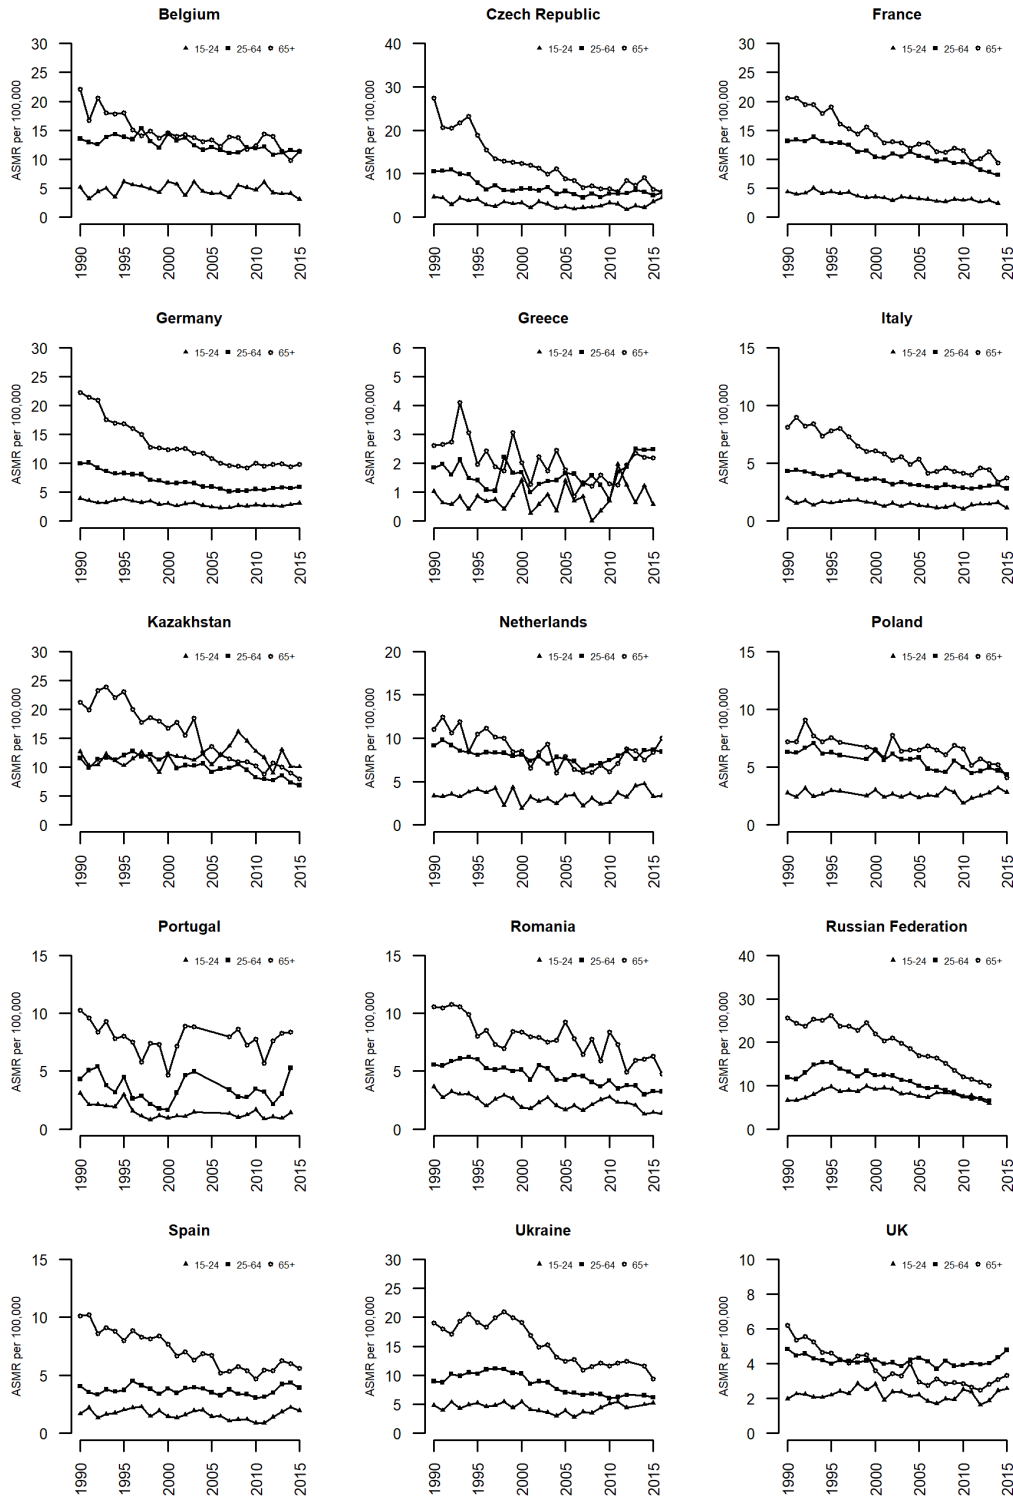

**Figure 6.** Age-standardized mortality rates (ASMRs) from suicide per 100,000 women from 1990 to 2015 in selected non-European countries by age categories (years)

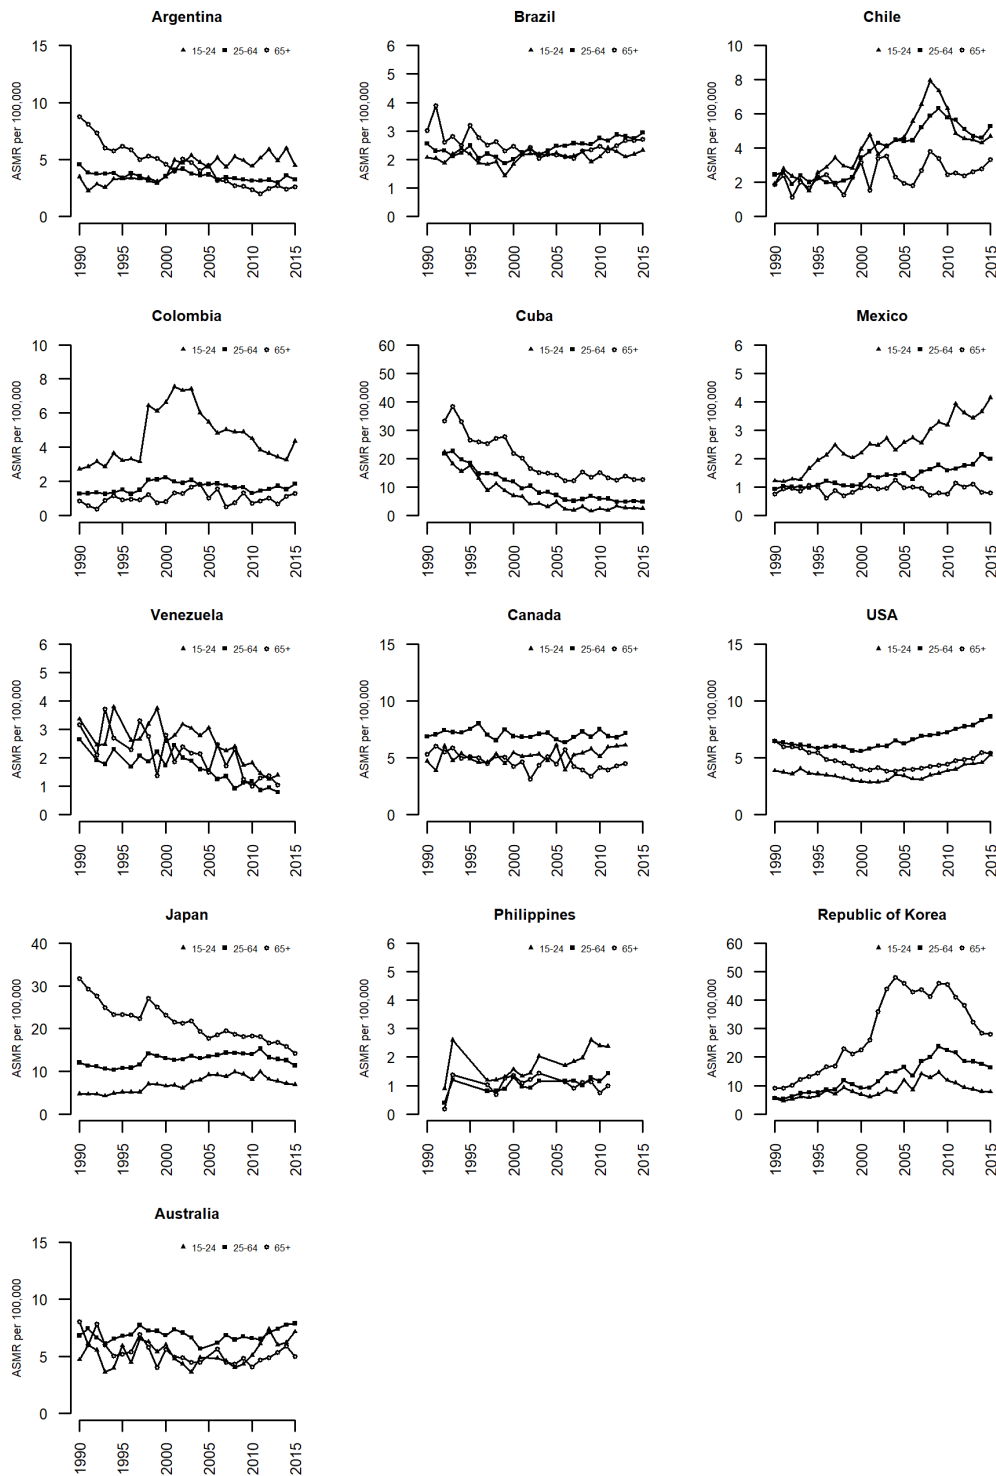

**Figure 7.** Unemployment rates (estimates from the International Labour Organization, ILO) from 1991 to 2015 in selected European countries by sex  
 ILOSTAT database: <https://www.ilo.org/global/statistics-and-databases/lang--en/index.htm> (accessed 15 Apr 2018)

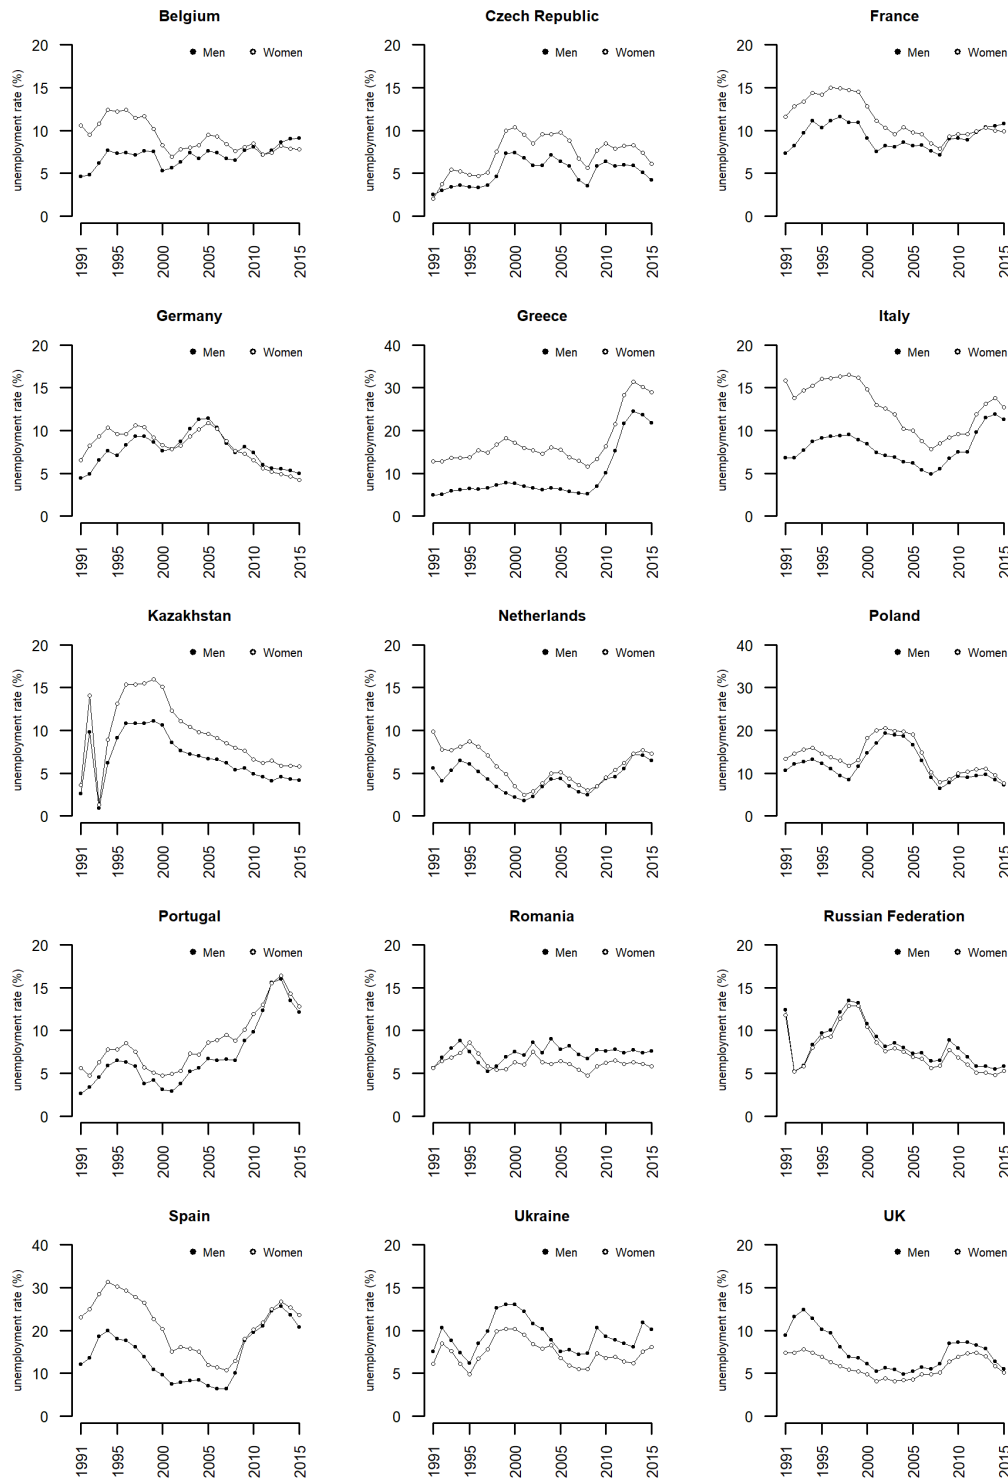

**Figure 8.** Unemployment rates (estimates from the International Labour Organization, ILO) from 1991 to 2015 in selected non-European countries by sex  
 ILOSTAT database: <https://www.ilo.org/global/statistics-and-databases/lang--en/index.htm> (accessed 15 Apr 2018)

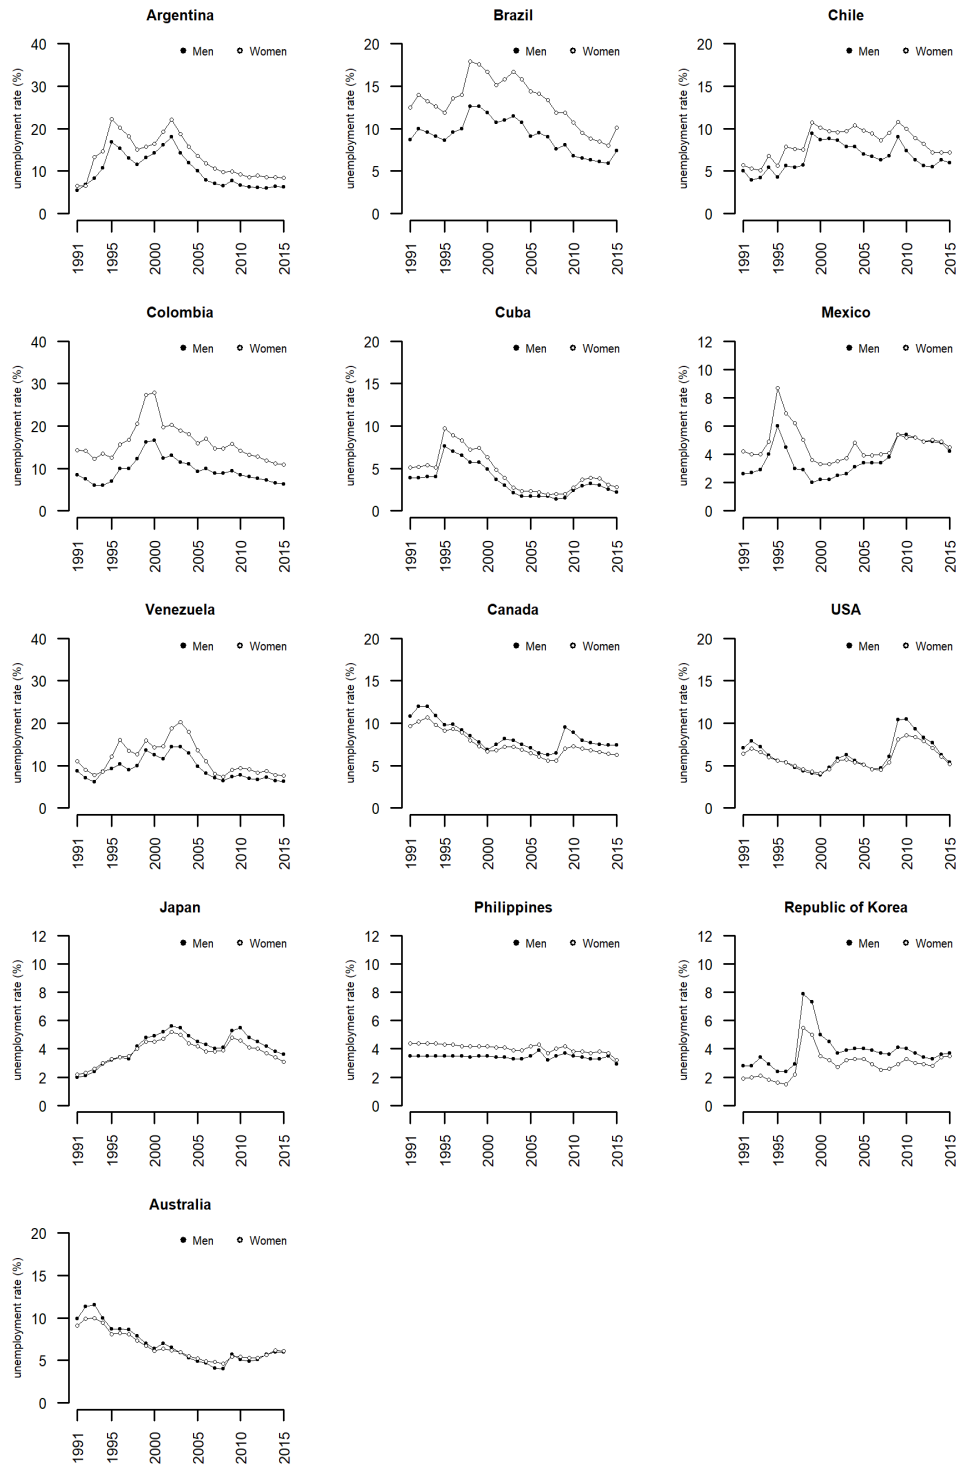

Supplement: MOESM1 [file 38_2019_1219_MOESM1_ESM.pdf]
